# Supplementary material
Source: publisher figshare collection journal article supplement (https://acs.figshare.com/ndownloader/files/13259306)
Supplement: Supplementary file 1 [file 13259306]

# Permission Request Form for Use of *Individual and/or Group Photos* in *ACS LiveSlides* from Copyright Owners/Publishers/Photographers Other Than ACS

Date: 7/09/2018

To: ACS  
Publisher's/Copyright Owner's Contact Information

JACS@jacs.acs.org  
Publisher's/Copyright Owner's Email Address

From: GEOFF COOPER  
Your Name and Complete Mailing Address  
CRONIN LABORATORY SCHOOL OF CHEMISTRY  
JOSEPH BLACK BUILDING  
GLASGOW G12 8QQ  
+44 141 330 5530  
Your Phone Number Including Country and City Codes  
geoff.cooper@glasgow.ac.uk  
Your Email Address

Your Specific Deadline Date

I am preparing an *ACS LiveSlides* entitled:  
INVESTIGATING THE FORMATION OF GIANT  $\gamma$ -IR 724<sup>PROP</sup> AND  $\gamma$ -IR 841<sup>GL4</sup> MACROCYCLES USING NMR, HPLC AND MASS SPECTROMETRY

to appear with  
10.1021/jacs.8b05059  
Title of ACS Publication and DOI

which is published by the American Chemical Society, a not-for-profit membership society and a STM signatory.

I would appreciate your permission to use the following material in all formats including but not limited to print, microform, electronic, and/or CD-ROM from the following reference:

## Individual Photographs of the Following Individuals:

\_\_\_\_\_  
\_\_\_\_\_  
\_\_\_\_\_

## Collective Photograph (s) representing the following groups:

THE CRONIN GROUP  
\_\_\_\_\_  
\_\_\_\_\_

If you, the photographer, have a required **credit line**, please include it below:

\_\_\_\_\_  
\_\_\_\_\_

For your convenience, you may sign and date the bottom of this letter to indicate your agreement. Please return this form to me at the above email address, by the above **deadline date** (if given above). Thank you.

Agreed:   
Publisher's/Copyright Owner's Signature or Stamp

Date: 07/09/2018

Date

**SIGN HERE**

Submit completed and signed form with your signed *ACS LiveSlides* Video Release.

7/25/16
