# Supplementary material
Source: publisher figshare collection journal article supplement (https://acs.figshare.com/ndownloader/files/13259306)
Supplement: Supplementary file 2 [file 13259306]

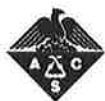

## AMERICAN CHEMICAL SOCIETY

MODEL RELEASE FORM for ACS LiveSlides  
(Person in Photograph)

This form cannot be altered. For questions, please contact [ACSPubsMultimedia@acs.org](mailto:ACSPubsMultimedia@acs.org)

Requesting Permission:

Date: 20/09/2018

To: GEOFF COOPER

Return to: LIA VILA NADAL

I am preparing material for  
Investigating the formation of giant  $\text{Pd}_{72}\text{Y}^{\text{Pd}}$  and  $\text{Pd}_{84}\text{Y}^{\text{Pd}}$   
macrocycles using NMR, HPLC AND MASS SPECTROMETRY  
(title of ACS LifeSlide)

to be published by the American Chemical Society, a not-for-profit membership society.

I would like your permission to include the enclosed photograph(s) in which you appear. To indicate your permission, please sign and date the statement below and return this form to me.

I appreciate your prompt response,

Signed: Lia Vila Nadal

Grant of Permission:

I hereby grant to the American Chemical Society royalty-free permission, including nonexclusive world rights in all languages, to reproduce in all formats including but not limited to print, microform, electronic, and/or CD-ROM, to reproduce and include my likeness as shown in the attached photocopy(ies) of photograph(s) for the above-mentioned publication.

Agree to and accepted:

Signature [Signature] Date: 20/09/2018

**SIGN HERE**

Check one of the blanks:

☒ I am the person in the photo

☒ I am the authorized agent for the person in the photo (for group photographs, one person, in the photograph, needs to sign on behalf of the group)

Submit completed and signed form with your signed ACS Journals LifeSlides Video Release.

7/19/16
